# Supplementary material
Source: PubMed Central journal article supplement (PMC6066344)

**Note to readers with disabilities:** *EHP* strives to ensure that all journal content is accessible to all readers. However, some figures and Supplemental Material published in *EHP* articles may not conform to [508 standards](#) due to the complexity of the information being presented. If you need assistance accessing journal content, please contact [ehp508@niehs.nih.gov](mailto:ehp508@niehs.nih.gov). Our staff will work with you to assess and meet your accessibility needs within 3 working days.

## **Supplemental Material**

### **Estimating Acute Cardiovascular Effects of Ambient PM<sub>2.5</sub> Metals**

Dongni Ye, Mitchel Klein, James A. Mulholland, Armistead G. Russell, Rodney Weber, Eric S. Edgerton, Howard H. Chang, Jeremy A. Sarnat, Paige E. Tolbert, and Stefanie Ebel Sarnat

#### **Table of Contents**

**Table S1.** Limits of detection (LOD) in ng/m<sup>3</sup> of PM<sub>2.5</sub> trace components measured at the Atlanta Jefferson Street monitoring site, and % of measurements below LOD, during 1998-2008 and 2008-2013.

**Table S2a.** Summary statistics of ambient air pollutants measured at the Atlanta Jefferson Street monitoring site during the warm season (May - October), 1998-2013 and 2008-2013.

**Table S2b.** Summary statistics of ambient air pollutants measured at the Atlanta Jefferson Street monitoring site during the cold season (November - April), 1998-2013 and 2008-2013.

**Table S3.** Year-round Pearson correlations among pollutants, 1998-2013 and 2008-2013.

**Table S4a.** Pearson correlations among pollutants during the warm season (May - October), 1998-2013 and 2008-2013.

**Table S4b.** Pearson correlations among pollutants during the cold season (November - April), 1998-2013 and 2008-2013.

**Figure S1.** Estimated associations between cardiovascular ED visits and tomorrow's pollutant levels, 1998-2013 year-round analysis (3303 days).

**Figure S2.** Estimated associations between cardiovascular ED visits and tomorrow's pollutant levels, 2008-2013 year-round analysis (628 days).

**Figure S3.** Estimated associations between cardiovascular ED visits and pollutants available during 1998-2013, year-round analysis including all days with data available for each pollutant.

**Figure S4.** Estimated associations between cardiovascular ED visits and pollutants available during 1998-2013, warm-season analysis including all days with data available for each pollutant.

**Figure S5.** Estimated associations between cardiovascular ED visits and pollutants available during 1998-2013, cold-season analysis including all days with data available for each pollutant.

**Figure S6.** Estimated associations between cardiovascular ED visits and pollutants only available during 2008-2013 and water-soluble Fe during 2008-2013, year-round analysis including all days with data available for each pollutant.

**Table S1. Limits of detection (LOD) in ng/m<sup>3</sup> of PM<sub>2.5</sub> trace components measured at the Atlanta Jefferson Street monitoring site, and % of measurements below LOD, during 1998-2008 and 2008-2013.<sup>a</sup>**

| <b>POLLUTANTS</b>       | <b>Measurement Period</b> | <b>Time Period in Health Analysis</b> | <b>LOD 1998-2008</b> | <b>LOD 2008-2013</b> | <b>%&lt;LOD 1998-2008</b> | <b>%&lt;LOD 2008-2013</b> | <b>%&lt;LOD 1998-2013</b> |
|-------------------------|---------------------------|---------------------------------------|----------------------|----------------------|---------------------------|---------------------------|---------------------------|
| <b>Na</b>               | 2008-2013                 | 2008-2013                             | n/a                  | 4.0                  | n/a                       | 5                         | 5                         |
| <b>Al</b>               | 1998-2013                 | 2008-2013                             | 6.4                  | 6.0                  | 26                        | 7                         | 19                        |
| <b>Si</b>               | 1998-2013                 | 1998-2013                             | 3.7                  | 5.7                  | <1                        | 2                         | 1                         |
| <b>S</b>                | 1998-2013                 | 1998-2013                             | 1.0                  | 1.5                  | 0                         | 0                         | 0                         |
| <b>K</b>                | 1998-2013                 | 1998-2013                             | 0.8                  | 0.7                  | <1                        | <1                        | <1                        |
| <b>Ca</b>               | 1998-2013                 | 1998-2013                             | 8.6                  | 3.7                  | 3                         | 1                         | 2                         |
| <b>Ti</b>               | 1998-2013                 | 2008-2013                             | 4.3                  | 0.3                  | 77                        | 2                         | 47                        |
| <b>Mn</b>               | 1998-2013                 | excluded                              | 0.8                  | 1.2                  | 41                        | 31                        | 37                        |
| <b>Fe</b>               | 1998-2013                 | 1998-2013                             | 4.9                  | 1.4                  | <1                        | <1                        | <1                        |
| <b>Cu</b>               | 1998-2013                 | 2008-2013                             | 1.2                  | 1.6                  | 49                        | 12                        | 34                        |
| <b>Zn</b>               | 1998-2013                 | 1998-2013                             | 0.8                  | 0.7                  | <1                        | 1                         | 1                         |
| <b>Pb</b>               | 1998-2013                 | excluded                              | 2.3                  | 1.9                  | 55                        | 38                        | 48                        |
| <b>water-soluble V</b>  | 1998-2013                 | 2008-2013                             | 0.58                 | 0.005                | 95                        | <1                        | 77                        |
| <b>water-soluble Cr</b> | 1998-2013                 | 2008-2013                             | 1.04                 | 0.014                | 87                        | 1                         | 70                        |
| <b>water-soluble Mn</b> | 1998-2013                 | 2008-2013                             | 0.29                 | 0.023                | 65                        | 0                         | 50                        |

| <b>POLLUTANTS</b>       | <b>Measurement Period</b> | <b>Time Period in Health Analysis</b> | <b>LOD 1998-2008</b> | <b>LOD 2008-2013</b> | <b>%&lt;LOD 1998-2008</b> | <b>%&lt;LOD 2008-2013</b> | <b>%&lt;LOD 1998-2013</b> |
|-------------------------|---------------------------|---------------------------------------|----------------------|----------------------|---------------------------|---------------------------|---------------------------|
| <b>water-soluble Ni</b> | 1998-2013                 | 2008-2013                             | 1.04                 | 0.046                | 97                        | 7                         | 79                        |
| <b>water-soluble Fe</b> | 1998-2013                 | 1998-2013                             | 2.63                 | 0.698                | 1                         | <1                        | 1                         |
| <b>water-soluble Cu</b> | 1998-2013                 | 2008-2013                             | 0.79                 | 0.741                | 53                        | 12                        | 45                        |
| <b>water-soluble Zn</b> | 2008-2013                 | 2008-2013                             | n/a                  | 0.617                | n/a                       | 0                         | 0                         |
| <b>water-soluble As</b> | 2008-2013                 | 2008-2013                             | n/a                  | 0.026                | n/a                       | <1                        | <1                        |
| <b>water-soluble Se</b> | 2008-2013                 | 2008-2013                             | n/a                  | 0.024                | n/a                       | 0                         | 0                         |
| <b>water-soluble Cd</b> | 2008-2013                 | 2008-2013                             | n/a                  | 0.004                | n/a                       | <1                        | <1                        |
| <b>water-soluble Ba</b> | 2008-2013                 | 2008-2013                             | n/a                  | 0.118                | n/a                       | 0                         | 0                         |
| <b>water-soluble La</b> | 2008-2013                 | excluded                              | n/a                  | 0.007                | n/a                       | 51                        | 51                        |
| <b>water-soluble Pb</b> | 2008-2013                 | 2008-2013                             | n/a                  | 0.025                | n/a                       | 0                         | 0                         |

<sup>a</sup> Total elemental concentrations of PM<sub>2.5</sub> metals/metalloids, including titanium (Ti), manganese (Mn), iron (Fe), copper (Cu), zinc (Zn), aluminum (Al), lead (Pb), silicon (Si), calcium (Ca), sodium (Na), and potassium (K), were analyzed from the daily PM<sub>2.5</sub> filters using X-ray fluorescence. X-ray fluorescence analyses were conducted by Desert Research Institute on filters collected through 3/22/2008, and by Atmospheric Research & Analysis Inc. on filters collected after 3/23/2008; different limits of detection (LOD) were reported before and after the laboratory change for each species. Water-soluble concentrations of PM<sub>2.5</sub> metals/metalloids, including water-soluble vanadium (WS V), water-soluble chromium (WS Cr), water-soluble manganese (WS Mn), water-soluble iron (WS Fe), water-soluble nickel (WS Ni), and water-soluble copper (WS Cu), were analyzed using inductive-coupled plasma optical emission

spectrometry (ICP-OES) during 8/14/1998 – 4/6/2008. Starting from 4/7/2008, these water-soluble fractions were analyzed using inductive-coupled plasma mass spectrometry (ICP-MS); again, different LODs were reported before and after the analytical change for these species. Additional water-soluble species, including water-soluble zinc (WS Zn), water-soluble cadmium (WS Cd), water-soluble lead (WS Pb), water-soluble selenium (WS Se), water-soluble arsenic (WS As), water-soluble barium (WS Ba), and water-soluble lanthanum (WS La), were reported starting in 4/7/2008 from ICP-MS analyses. All water-soluble measures were available daily before 2009 and one-in-three day after 2009.

**Table S2a. Summary statistics of ambient air pollutants measured at the Atlanta Jefferson Street monitoring site during the warm season (May - October), 1998-2013 and 2008-2013.**

| POLLUTANTS                    | UNIT              | N    | MEAN (SD)    | 50 <sup>th</sup> (25 <sup>th</sup> , 75 <sup>th</sup> ) PERCENTILES |
|-------------------------------|-------------------|------|--------------|---------------------------------------------------------------------|
| <b>8/14/1998 – 12/15/2013</b> |                   |      |              |                                                                     |
| <i>Criteria gases</i>         |                   |      |              |                                                                     |
| CO                            | ppm               | 2755 | 0.74 (0.66)  | 0.53 (0.35, 0.88)                                                   |
| NO <sub>2</sub>               | ppb               | 2738 | 36.5 (15.9)  | 34.6 (25.3, 45.9)                                                   |
| SO <sub>2</sub>               | ppb               | 2771 | 11.7 (13.3)  | 6.6 (2.6, 16.2)                                                     |
| O <sub>3</sub>                | ppb               | 2786 | 52.0 (19.7)  | 51.5 (37.9, 64.6)                                                   |
| <i>PM<sub>2.5</sub></i>       |                   |      |              |                                                                     |
| PM <sub>2.5</sub>             | µg/m <sup>3</sup> | 2839 | 16.11 (8.24) | 14.64 (10.00, 20.56)                                                |
| OC                            | µg/m <sup>3</sup> | 2820 | 3.63 (1.79)  | 3.28 (2.42, 4.39)                                                   |
| EC                            | µg/m <sup>3</sup> | 2811 | 1.27 (0.92)  | 1.01 (0.66, 1.59)                                                   |
| NH <sub>4</sub>               | µg/m <sup>3</sup> | 2831 | 1.69 (1.18)  | 1.37 (0.83, 2.22)                                                   |
| NO <sub>3</sub>               | µg/m <sup>3</sup> | 2831 | 0.47 (0.36)  | 0.36 (0.24, 0.58)                                                   |
| SO <sub>4</sub>               | µg/m <sup>3</sup> | 2835 | 5.03 (3.47)  | 4.10 (2.48, 6.56)                                                   |

| <b>POLLUTANTS</b>            | <b>UNIT</b>       | <b>N</b> | <b>MEAN (SD)</b> | <b>50<sup>th</sup> (25<sup>th</sup>, 75<sup>th</sup>) PERCENTILES</b> |
|------------------------------|-------------------|----------|------------------|-----------------------------------------------------------------------|
| <b>Si</b>                    | ng/m <sup>3</sup> | 2564     | 116.76 (135.99)  | 82.15 (50.50, 132.36)                                                 |
| <b>K</b>                     | ng/m <sup>3</sup> | 2564     | 62.44 (101.37)   | 47.38 (34.34, 68.10)                                                  |
| <b>Ca</b>                    | ng/m <sup>3</sup> | 2564     | 39.29 (31.78)    | 31.57 (20.45, 48.24)                                                  |
| <b>Fe</b>                    | ng/m <sup>3</sup> | 2556     | 82.46 (59.67)    | 67.29 (45.54, 99.69)                                                  |
| <b>Zn</b>                    | ng/m <sup>3</sup> | 2525     | 9.76 (8.66)      | 7.87 (5.07, 11.64)                                                    |
| <b>water-soluble Fe</b>      | ng/m <sup>3</sup> | 2104     | 31.72 (23.64)    | 25.83 (16.36, 40.63)                                                  |
| <b>4/7/2008 – 12/15/2013</b> |                   |          |                  |                                                                       |
| <b>Na</b>                    | ng/m <sup>3</sup> | 1050     | 36.34 (32.06)    | 26.76 (15.58, 45.38)                                                  |
| <b>Al</b>                    | ng/m <sup>3</sup> | 1051     | 57.44 (73.83)    | 39.46 (22.42, 65.77)                                                  |
| <b>Ti</b>                    | ng/m <sup>3</sup> | 1051     | 5.25 (4.59)      | 4.12 (2.82, 6.20)                                                     |
| <b>Cu</b>                    | ng/m <sup>3</sup> | 1045     | 5.04 (5.50)      | 3.96 (2.68, 5.67)                                                     |
| <b>water-soluble V</b>       | ng/m <sup>3</sup> | 463      | 0.20 (0.17)      | 0.15 (0.09, 0.28)                                                     |
| <b>water-soluble Cr</b>      | ng/m <sup>3</sup> | 463      | 0.15 (0.21)      | 0.11 (0.07, 0.16)                                                     |
| <b>water-soluble Mn</b>      | ng/m <sup>3</sup> | 463      | 1.31 (0.92)      | 1.08 (0.66, 1.70)                                                     |

| <b>POLLUTANTS</b>       | <b>UNIT</b>       | <b>N</b> | <b>MEAN (SD)</b> | <b>50<sup>th</sup> (25<sup>th</sup>, 75<sup>th</sup>) PERCENTILES</b> |
|-------------------------|-------------------|----------|------------------|-----------------------------------------------------------------------|
| <b>water-soluble Ni</b> | ng/m <sup>3</sup> | 463      | 0.34 (0.69)      | 0.17 (0.11, 0.27)                                                     |
| <b>water-soluble Cu</b> | ng/m <sup>3</sup> | 457      | 2.83 (3.27)      | 2.04 (1.31, 3.22)                                                     |
| <b>water-soluble Zn</b> | ng/m <sup>3</sup> | 368      | 8.73 (5.90)      | 7.14 (4.59, 11.16)                                                    |
| <b>water-soluble As</b> | ng/m <sup>3</sup> | 463      | 0.62 (0.40)      | 0.54 (0.37, 0.74)                                                     |
| <b>water-soluble Se</b> | ng/m <sup>3</sup> | 463      | 0.75 (0.61)      | 0.60 (0.39, 0.94)                                                     |
| <b>water-soluble Cd</b> | ng/m <sup>3</sup> | 463      | 0.06 (0.05)      | 0.05 (0.03, 0.07)                                                     |
| <b>water-soluble Ba</b> | ng/m <sup>3</sup> | 463      | 3.24 (3.37)      | 2.61 (1.60, 4.34)                                                     |
| <b>water-soluble Pb</b> | ng/m <sup>3</sup> | 462      | 1.22 (1.25)      | 0.89 (0.59, 1.39)                                                     |



**Table S2b. Summary statistics of ambient air pollutants measured at the Atlanta Jefferson Street monitoring site during the cold season (November - April), 1998-2013 and 2008-2013.**

| <b>POLLUTANTS</b>             | <b>UNIT</b>       | <b>N</b> | <b>MEAN (SD)</b> | <b>50<sup>th</sup> (25<sup>th</sup>, 75<sup>th</sup>) PERCENTILES</b> |
|-------------------------------|-------------------|----------|------------------|-----------------------------------------------------------------------|
| <b>8/14/1998 – 12/15/2013</b> |                   |          |                  |                                                                       |
| <i>Criteria gases</i>         |                   |          |                  |                                                                       |
| <b>CO</b>                     | ppm               | 2703     | 0.97 (0.97)      | 0.61 (0.37, 1.19)                                                     |
| <b>NO<sub>2</sub></b>         | ppb               | 2583     | 37.9 (14.4)      | 37.4 (27.7, 46.9)                                                     |
| <b>SO<sub>2</sub></b>         | ppb               | 2694     | 15.2 (15.8)      | 9.9 (4.0, 21.0)                                                       |
| <b>O<sub>3</sub></b>          | ppb               | 2704     | 31.9 (14.0)      | 30.4 (22.0, 40.6)                                                     |
| <i>PM<sub>2.5</sub></i>       |                   |          |                  |                                                                       |
| <b>PM<sub>2.5</sub></b>       | µg/m <sup>3</sup> | 2749     | 12.77 (6.67)     | 11.39 (8.14, 15.93)                                                   |
| <b>OC</b>                     | µg/m <sup>3</sup> | 2726     | 3.72 (2.34)      | 3.15 (2.18, 4.57)                                                     |
| <b>EC</b>                     | µg/m <sup>3</sup> | 2704     | 1.26 (1.03)      | 0.96 (0.59, 1.56)                                                     |
| <b>NH<sub>4</sub></b>         | µg/m <sup>3</sup> | 2732     | 1.07 (0.62)      | 0.93 (0.64, 1.34)                                                     |
| <b>NO<sub>3</sub></b>         | µg/m <sup>3</sup> | 2738     | 1.17 (0.90)      | 0.93 (0.52, 1.57)                                                     |
| <b>SO<sub>4</sub></b>         | µg/m <sup>3</sup> | 2737     | 2.68 (1.60)      | 2.3 (1.58, 3.35)                                                      |

| <b>POLLUTANTS</b>            | <b>UNIT</b>       | <b>N</b> | <b>MEAN (SD)</b> | <b>50<sup>th</sup> (25<sup>th</sup>, 75<sup>th</sup>) PERCENTILES</b> |
|------------------------------|-------------------|----------|------------------|-----------------------------------------------------------------------|
| <b>Si</b>                    | ng/m <sup>3</sup> | 2368     | 70.42 (71.86)    | 54.17 (32.42, 88.58)                                                  |
| <b>K</b>                     | ng/m <sup>3</sup> | 2368     | 65.22 (59.40)    | 55.67 (36.69, 82.00)                                                  |
| <b>Ca</b>                    | ng/m <sup>3</sup> | 2368     | 33.32 (26.96)    | 26.77 (16.55, 41.08)                                                  |
| <b>Fe</b>                    | ng/m <sup>3</sup> | 2365     | 70.07 (58.41)    | 52.65 (34.40, 87.60)                                                  |
| <b>Zn</b>                    | ng/m <sup>3</sup> | 2355     | 13.06 (13.13)    | 10.11 (6.58, 15.33)                                                   |
| <b>water-soluble Fe</b>      | ng/m <sup>3</sup> | 1981     | 16.25 (12.68)    | 13.31 (8.02, 20.29)                                                   |
| <b>4/7/2008 – 12/15/2013</b> |                   |          |                  |                                                                       |
| <b>Na</b>                    | ng/m <sup>3</sup> | 880      | 41.85 (46.32)    | 25.27 (13.98, 49.00)                                                  |
| <b>Al</b>                    | ng/m <sup>3</sup> | 880      | 32.25 (30.23)    | 24.85 (12.98, 45.46)                                                  |
| <b>Ti</b>                    | ng/m <sup>3</sup> | 880      | 3.54 (2.61)      | 3.05 (1.91, 4.45)                                                     |
| <b>Cu</b>                    | ng/m <sup>3</sup> | 871      | 5.65 (14.20)     | 3.51 (2.23, 5.68)                                                     |
| <b>water-soluble V</b>       | ng/m <sup>3</sup> | 342      | 0.19 (0.21)      | 0.11 (0.06, 0.25)                                                     |
| <b>water-soluble Cr</b>      | ng/m <sup>3</sup> | 342      | 0.11 (0.10)      | 0.08 (0.05, 0.14)                                                     |
| <b>water-soluble Mn</b>      | ng/m <sup>3</sup> | 333      | 1.04 (1.03)      | 0.76 (0.47, 1.29)                                                     |

| <b>POLLUTANTS</b>       | <b>UNIT</b>       | <b>N</b> | <b>MEAN (SD)</b> | <b>50<sup>th</sup> (25<sup>th</sup>, 75<sup>th</sup>) PERCENTILES</b> |
|-------------------------|-------------------|----------|------------------|-----------------------------------------------------------------------|
| <b>water-soluble Ni</b> | ng/m <sup>3</sup> | 342      | 0.25 (0.67)      | 0.13 (0.07, 0.22)                                                     |
| <b>water-soluble Cu</b> | ng/m <sup>3</sup> | 333      | 2.83 (5.89)      | 1.49 (0.85, 2.85)                                                     |
| <b>water-soluble Zn</b> | ng/m <sup>3</sup> | 314      | 9.30 (6.40)      | 7.60 (4.96, 11.15)                                                    |
| <b>water-soluble As</b> | ng/m <sup>3</sup> | 342      | 0.76 (0.65)      | 0.60 (0.34, 0.93)                                                     |
| <b>water-soluble Se</b> | ng/m <sup>3</sup> | 342      | 0.66 (0.55)      | 0.47 (0.29, 0.85)                                                     |
| <b>water-soluble Cd</b> | ng/m <sup>3</sup> | 342      | 0.10 (0.10)      | 0.08 (0.05, 0.12)                                                     |
| <b>water-soluble Ba</b> | ng/m <sup>3</sup> | 342      | 3.00 (3.00)      | 2.12 (1.12, 3.83)                                                     |
| <b>water-soluble Pb</b> | ng/m <sup>3</sup> | 341      | 1.62 (4.33)      | 0.84 (0.54, 1.45)                                                     |

**Table S3. Year-round Pearson correlations among pollutants, 1998-2013 and 2008-2013.**

| <b>1998-2013</b>        | <b>CO</b> | <b>NO<sub>2</sub></b> | <b>SO<sub>2</sub></b> | <b>O<sub>3</sub></b> | <b>PM<sub>2.5</sub></b> | <b>OC</b> | <b>EC</b> | <b>NO<sub>3</sub></b> | <b>SO<sub>4</sub></b> | <b>Si</b> | <b>K</b> | <b>Ca</b> | <b>Fe</b> | <b>Zn</b> | <b>WS Fe</b> |
|-------------------------|-----------|-----------------------|-----------------------|----------------------|-------------------------|-----------|-----------|-----------------------|-----------------------|-----------|----------|-----------|-----------|-----------|--------------|
| <b>CO</b>               | 1.00      |                       |                       |                      |                         |           |           |                       |                       |           |          |           |           |           |              |
| <b>NO<sub>2</sub></b>   | 0.55      | 1.00                  |                       |                      |                         |           |           |                       |                       |           |          |           |           |           |              |
| <b>SO<sub>2</sub></b>   | 0.32      | 0.30                  | 1.00                  |                      |                         |           |           |                       |                       |           |          |           |           |           |              |
| <b>O<sub>3</sub></b>    | 0.01      | 0.33                  | -0.04                 | 1.00                 |                         |           |           |                       |                       |           |          |           |           |           |              |
| <b>PM<sub>2.5</sub></b> | 0.47      | 0.50                  | 0.24                  | 0.44                 | 1.00                    |           |           |                       |                       |           |          |           |           |           |              |
| <b>OC</b>               | 0.64      | 0.53                  | 0.21                  | 0.22                 | 0.74                    | 1.00      |           |                       |                       |           |          |           |           |           |              |
| <b>EC</b>               | 0.73      | 0.58                  | 0.28                  | 0.12                 | 0.67                    | 0.79      | 1.00      |                       |                       |           |          |           |           |           |              |
| <b>NO<sub>3</sub></b>   | 0.26      | 0.18                  | 0.21                  | -0.37                | 0.24                    | 0.26      | 0.27      | 1.00                  |                       |           |          |           |           |           |              |
| <b>SO<sub>4</sub></b>   | 0.14      | 0.30                  | 0.16                  | 0.55                 | 0.80                    | 0.34      | 0.34      | 0.01                  | 1.00                  |           |          |           |           |           |              |
| <b>Si</b>               | 0.12      | 0.15                  | 0.08                  | 0.22                 | 0.23                    | 0.17      | 0.19      | -0.11                 | 0.13                  | 1.00      |          |           |           |           |              |
| <b>K</b>                | 0.17      | 0.15                  | 0.03                  | 0.09                 | 0.25                    | 0.28      | 0.20      | 0.07                  | 0.08                  | 0.21      | 1.00     |           |           |           |              |
| <b>Ca</b>               | 0.38      | 0.43                  | 0.28                  | 0.27                 | 0.44                    | 0.38      | 0.47      | 0.08                  | 0.28                  | 0.62      | 0.20     | 1.00      |           |           |              |
| <b>Fe</b>               | 0.48      | 0.43                  | 0.17                  | 0.21                 | 0.47                    | 0.49      | 0.58      | 0.07                  | 0.19                  | 0.69      | 0.26     | 0.66      | 1.00      |           |              |
| <b>Zn</b>               | 0.49      | 0.33                  | 0.20                  | -0.03                | 0.38                    | 0.45      | 0.50      | 0.28                  | 0.10                  | 0.11      | 0.18     | 0.34      | 0.42      | 1.00      |              |
| <b>WS Fe</b>            | 0.27      | 0.37                  | 0.13                  | 0.46                 | 0.65                    | 0.39      | 0.48      | -0.05                 | 0.61                  | 0.48      | 0.18     | 0.47      | 0.64      | 0.16      | 1.00         |

  

| <b>2008-2013</b> | <b>CO</b> | <b>NO<sub>2</sub></b> | <b>SO<sub>2</sub></b> | <b>O<sub>3</sub></b> | <b>PM<sub>2.5</sub></b> | <b>OC</b> | <b>EC</b> | <b>NO<sub>3</sub></b> | <b>SO<sub>4</sub></b> | <b>Si</b> | <b>K</b> | <b>Ca</b> | <b>Fe</b> | <b>Zn</b> | <b>WS Fe</b> |
|------------------|-----------|-----------------------|-----------------------|----------------------|-------------------------|-----------|-----------|-----------------------|-----------------------|-----------|----------|-----------|-----------|-----------|--------------|
| <b>Na</b>        | -0.03     | -0.06                 | -0.12                 | -0.06                | 0.08                    | 0.11      | 0.02      | -0.09                 | -0.01                 | 0.20      | 0.15     | 0.16      | 0.10      | 0.06      | 0.01         |
| <b>Al</b>        | -0.03     | -0.02                 | -0.05                 | 0.15                 | 0.17                    | 0.07      | 0.05      | -0.16                 | 0.06                  | 0.94      | 0.26     | 0.59      | 0.53      | -0.02     | 0.31         |
| <b>Ti</b>        | 0.15      | 0.17                  | 0.10                  | 0.22                 | 0.32                    | 0.24      | 0.27      | -0.10                 | 0.16                  | 0.87      | 0.28     | 0.70      | 0.70      | 0.18      | 0.43         |
| <b>Cu</b>        | 0.26      | 0.24                  | 0.07                  | 0.07                 | 0.21                    | 0.25      | 0.27      | 0.06                  | 0.05                  | 0.09      | 0.23     | 0.21      | 0.26      | 0.21      | 0.23         |
| <b>WS V</b>      | -0.10     | -0.11                 | -0.05                 | -0.01                | 0.21                    | 0.10      | -0.03     | -0.09                 | 0.25                  | 0.23      | 0.15     | 0.14      | 0.07      | 0.00      | 0.17         |
| <b>WS Cr</b>     | 0.21      | 0.17                  | 0.02                  | 0.16                 | 0.26                    | 0.21      | 0.25      | -0.02                 | 0.16                  | 0.12      | 0.19     | 0.18      | 0.24      | 0.21      | 0.34         |
| <b>WS Mn</b>     | 0.33      | 0.35                  | 0.12                  | 0.26                 | 0.45                    | 0.36      | 0.49      | -0.05                 | 0.28                  | 0.31      | 0.31     | 0.41      | 0.60      | 0.39      | 0.52         |
| <b>WS Ni</b>     | 0.01      | -0.01                 | 0.04                  | 0.09                 | 0.02                    | 0.03      | 0.06      | -0.08                 | 0.02                  | 0.04      | 0.07     | 0.01      | 0.06      | 0.03      | 0.07         |
| <b>WS Cu</b>     | 0.27      | 0.26                  | 0.07                  | 0.10                 | 0.24                    | 0.27      | 0.30      | 0.01                  | 0.09                  | 0.06      | 0.24     | 0.15      | 0.26      | 0.22      | 0.27         |
| <b>WS Zn</b>     | 0.51      | 0.45                  | 0.13                  | 0.07                 | 0.44                    | 0.45      | 0.58      | 0.18                  | 0.24                  | 0.05      | 0.19     | 0.27      | 0.39      | 0.80      | 0.37         |
| <b>WS As</b>     | 0.50      | 0.30                  | 0.07                  | -0.05                | 0.28                    | 0.40      | 0.47      | 0.23                  | 0.01                  | 0.00      | 0.12     | 0.11      | 0.29      | 0.29      | 0.20         |
| <b>WS Se</b>     | 0.16      | 0.24                  | 0.42                  | 0.13                 | 0.46                    | 0.27      | 0.26      | 0.14                  | 0.46                  | 0.07      | 0.08     | 0.26      | 0.20      | 0.18      | 0.41         |
| <b>WS Cd</b>     | 0.48      | 0.34                  | 0.16                  | -0.08                | 0.31                    | 0.45      | 0.47      | 0.30                  | 0.04                  | 0.00      | 0.16     | 0.18      | 0.32      | 0.47      | 0.21         |
| <b>WS Ba</b>     | 0.42      | 0.39                  | 0.16                  | 0.23                 | 0.36                    | 0.38      | 0.50      | 0.05                  | 0.18                  | 0.17      | 0.72     | 0.30      | 0.49      | 0.33      | 0.39         |
| <b>WS Pb</b>     | 0.25      | 0.17                  | 0.06                  | 0.04                 | 0.19                    | 0.23      | 0.19      | 0.07                  | 0.06                  | 0.00      | 0.12     | 0.07      | 0.10      | 0.22      | 0.13         |

| <b>2008-2013</b> | <b>Na</b>   | <b>Al</b>   | <b>Ti</b>   | <b>Cu</b>   | <b>WS V</b> | <b>WS Cr</b> | <b>WS Mn</b> | <b>WS Ni</b> | <b>WS Cu</b> | <b>WS Zn</b> | <b>WS As</b> | <b>WS Se</b> | <b>WS Cd</b> | <b>WS Ba</b> | <b>WS Pb</b> |
|------------------|-------------|-------------|-------------|-------------|-------------|--------------|--------------|--------------|--------------|--------------|--------------|--------------|--------------|--------------|--------------|
| <b>Na</b>        | <b>1.00</b> |             |             |             |             |              |              |              |              |              |              |              |              |              |              |
| <b>Al</b>        | 0.21        | <b>1.00</b> |             |             |             |              |              |              |              |              |              |              |              |              |              |
| <b>Ti</b>        | 0.19        | <b>0.83</b> | <b>1.00</b> |             |             |              |              |              |              |              |              |              |              |              |              |
| <b>Cu</b>        | 0.00        | 0.06        | 0.17        | <b>1.00</b> |             |              |              |              |              |              |              |              |              |              |              |
| <b>WS V</b>      | <b>0.48</b> | 0.21        | 0.21        | -0.03       | <b>1.00</b> |              |              |              |              |              |              |              |              |              |              |
| <b>WS Cr</b>     | 0.04        | 0.11        | 0.15        | 0.17        | 0.09        | <b>1.00</b>  |              |              |              |              |              |              |              |              |              |
| <b>WS Mn</b>     | 0.11        | 0.28        | <b>0.43</b> | 0.20        | 0.08        | 0.25         | <b>1.00</b>  |              |              |              |              |              |              |              |              |
| <b>WS Ni</b>     | 0.13        | 0.05        | 0.08        | 0.04        | 0.09        | 0.04         | 0.16         | <b>1.00</b>  |              |              |              |              |              |              |              |
| <b>WS Cu</b>     | -0.03       | 0.05        | 0.12        | <b>0.92</b> | -0.01       | 0.22         | 0.21         | 0.09         | <b>1.00</b>  |              |              |              |              |              |              |
| <b>WS Zn</b>     | -0.05       | 0.01        | 0.16        | 0.28        | -0.02       | 0.29         | 0.40         | 0.00         | 0.28         | <b>1.00</b>  |              |              |              |              |              |
| <b>WS As</b>     | -0.07       | -0.01       | 0.04        | 0.24        | -0.07       | 0.17         | 0.13         | -0.09        | 0.21         | 0.42         | <b>1.00</b>  |              |              |              |              |
| <b>WS Se</b>     | -0.01       | 0.01        | 0.10        | 0.10        | 0.15        | 0.18         | 0.11         | -0.02        | 0.13         | 0.25         | 0.29         | <b>1.00</b>  |              |              |              |
| <b>WS Cd</b>     | 0.02        | -0.02       | 0.06        | 0.41        | -0.04       | 0.14         | 0.19         | -0.05        | 0.36         | 0.52         | 0.52         | 0.38         | <b>1.00</b>  |              |              |
| <b>WS Ba</b>     | 0.02        | 0.19        | 0.31        | 0.34        | -0.08       | 0.22         | 0.56         | 0.15         | 0.34         | 0.36         | 0.21         | 0.12         | 0.24         | <b>1.00</b>  |              |
| <b>WS Pb</b>     | -0.02       | 0.01        | 0.04        | <b>0.71</b> | 0.02        | 0.10         | 0.05         | -0.01        | <b>0.73</b>  | 0.26         | 0.27         | 0.18         | 0.39         | 0.15         | <b>1.00</b>  |

**Table S4a. Pearson correlations among pollutants during the warm season (May - October), 1998-2013 and 2008-2013.**

| <b>1998-2013</b>        | <b>CO</b> | <b>NO<sub>2</sub></b> | <b>SO<sub>2</sub></b> | <b>O<sub>3</sub></b> | <b>PM<sub>2.5</sub></b> | <b>OC</b> | <b>EC</b> | <b>NO<sub>3</sub></b> | <b>SO<sub>4</sub></b> | <b>Si</b> | <b>K</b> | <b>Ca</b> | <b>Fe</b> | <b>Zn</b> | <b>WS Fe</b> |
|-------------------------|-----------|-----------------------|-----------------------|----------------------|-------------------------|-----------|-----------|-----------------------|-----------------------|-----------|----------|-----------|-----------|-----------|--------------|
| <b>CO</b>               | 1.00      |                       |                       |                      |                         |           |           |                       |                       |           |          |           |           |           |              |
| <b>NO<sub>2</sub></b>   | 0.60      | 1.00                  |                       |                      |                         |           |           |                       |                       |           |          |           |           |           |              |
| <b>SO<sub>2</sub></b>   | 0.28      | 0.29                  | 1.00                  |                      |                         |           |           |                       |                       |           |          |           |           |           |              |
| <b>O<sub>3</sub></b>    | 0.18      | 0.52                  | 0.14                  | 1.00                 |                         |           |           |                       |                       |           |          |           |           |           |              |
| <b>PM<sub>2.5</sub></b> | 0.45      | 0.57                  | 0.31                  | 0.59                 | 1.00                    |           |           |                       |                       |           |          |           |           |           |              |
| <b>OC</b>               | 0.55      | 0.58                  | 0.21                  | 0.48                 | 0.74                    | 1.00      |           |                       |                       |           |          |           |           |           |              |
| <b>EC</b>               | 0.72      | 0.63                  | 0.31                  | 0.30                 | 0.64                    | 0.71      | 1.00      |                       |                       |           |          |           |           |           |              |
| <b>NO<sub>3</sub></b>   | 0.48      | 0.41                  | 0.17                  | 0.09                 | 0.48                    | 0.46      | 0.55      | 1.00                  |                       |           |          |           |           |           |              |
| <b>SO<sub>4</sub></b>   | 0.26      | 0.43                  | 0.30                  | 0.54                 | 0.88                    | 0.49      | 0.45      | 0.40                  | 1.00                  |           |          |           |           |           |              |
| <b>Si</b>               | 0.09      | 0.10                  | 0.10                  | 0.06                 | 0.14                    | 0.11      | 0.14      | 0.04                  | 0.03                  | 1.00      |          |           |           |           |              |
| <b>K</b>                | 0.09      | 0.10                  | 0.02                  | 0.11                 | 0.16                    | 0.16      | 0.09      | 0.09                  | 0.07                  | 0.19      | 1.00     |           |           |           |              |
| <b>Ca</b>               | 0.40      | 0.44                  | 0.28                  | 0.29                 | 0.43                    | 0.38      | 0.49      | 0.31                  | 0.29                  | 0.59      | 0.17     | 1.00      |           |           |              |
| <b>Fe</b>               | 0.44      | 0.40                  | 0.20                  | 0.22                 | 0.38                    | 0.39      | 0.54      | 0.26                  | 0.18                  | 0.76      | 0.20     | 0.70      | 1.00      |           |              |
| <b>Zn</b>               | 0.46      | 0.37                  | 0.22                  | 0.17                 | 0.39                    | 0.39      | 0.51      | 0.34                  | 0.24                  | 0.10      | 0.13     | 0.40      | 0.39      | 1.00      |              |
| <b>WS Fe</b>            | 0.36      | 0.44                  | 0.24                  | 0.39                 | 0.64                    | 0.48      | 0.58      | 0.28                  | 0.56                  | 0.45      | 0.18     | 0.50      | 0.66      | 0.27      | 1.00         |

  

| <b>2008-2013</b> | <b>CO</b> | <b>NO<sub>2</sub></b> | <b>SO<sub>2</sub></b> | <b>O<sub>3</sub></b> | <b>PM<sub>2.5</sub></b> | <b>OC</b> | <b>EC</b> | <b>NO<sub>3</sub></b> | <b>SO<sub>4</sub></b> | <b>Si</b> | <b>K</b> | <b>Ca</b> | <b>Fe</b> | <b>Zn</b> | <b>WS Fe</b> |
|------------------|-----------|-----------------------|-----------------------|----------------------|-------------------------|-----------|-----------|-----------------------|-----------------------|-----------|----------|-----------|-----------|-----------|--------------|
| <b>Na</b>        | -0.12     | -0.12                 | -0.11                 | -0.14                | -0.02                   | -0.04     | -0.09     | -0.06                 | -0.06                 | 0.32      | 0.13     | 0.20      | 0.17      | -0.03     | 0.05         |
| <b>Al</b>        | -0.08     | -0.07                 | -0.04                 | -0.02                | 0.11                    | 0.01      | -0.01     | -0.02                 | -0.03                 | 0.96      | 0.25     | 0.60      | 0.68      | -0.03     | 0.30         |
| <b>Ti</b>        | 0.07      | 0.11                  | 0.07                  | 0.10                 | 0.25                    | 0.15      | 0.18      | 0.07                  | 0.09                  | 0.90      | 0.26     | 0.71      | 0.79      | 0.13      | 0.39         |
| <b>Cu</b>        | 0.30      | 0.28                  | 0.04                  | 0.20                 | 0.26                    | 0.29      | 0.31      | 0.18                  | 0.14                  | 0.09      | 0.50     | 0.28      | 0.27      | 0.19      | 0.30         |
| <b>WS V</b>      | -0.13     | -0.12                 | -0.01                 | -0.09                | 0.21                    | 0.08      | -0.07     | -0.01                 | 0.21                  | 0.33      | 0.12     | 0.20      | 0.19      | 0.01      | 0.22         |
| <b>WS Cr</b>     | 0.25      | 0.18                  | 0.00                  | 0.12                 | 0.21                    | 0.16      | 0.21      | 0.17                  | 0.11                  | 0.09      | 0.17     | 0.15      | 0.20      | 0.17      | 0.26         |
| <b>WS Mn</b>     | 0.31      | 0.40                  | 0.12                  | 0.29                 | 0.46                    | 0.38      | 0.43      | 0.21                  | 0.31                  | 0.36      | 0.33     | 0.53      | 0.58      | 0.38      | 0.53         |
| <b>WS Ni</b>     | 0.01      | -0.01                 | 0.08                  | 0.07                 | 0.00                    | 0.02      | 0.03      | 0.01                  | 0.01                  | 0.04      | 0.07     | 0.00      | 0.02      | 0.02      | 0.02         |
| <b>WS Cu</b>     | 0.32      | 0.32                  | 0.07                  | 0.19                 | 0.25                    | 0.22      | 0.32      | 0.19                  | 0.14                  | 0.09      | 0.39     | 0.23      | 0.30      | 0.15      | 0.34         |
| <b>WS Zn</b>     | 0.40      | 0.43                  | 0.11                  | 0.17                 | 0.41                    | 0.31      | 0.49      | 0.32                  | 0.38                  | 0.03      | 0.11     | 0.32      | 0.31      | 0.77      | 0.39         |
| <b>WS As</b>     | 0.39      | 0.20                  | 0.01                  | -0.01                | 0.18                    | 0.21      | 0.40      | 0.27                  | 0.05                  | -0.03     | 0.01     | 0.04      | 0.18      | 0.08      | 0.19         |
| <b>WS Se</b>     | 0.20      | 0.27                  | 0.43                  | 0.19                 | 0.47                    | 0.25      | 0.27      | 0.21                  | 0.48                  | 0.05      | 0.05     | 0.26      | 0.18      | 0.14      | 0.40         |
| <b>WS Cd</b>     | 0.48      | 0.41                  | 0.09                  | 0.07                 | 0.28                    | 0.30      | 0.45      | 0.36                  | 0.16                  | 0.02      | 0.12     | 0.24      | 0.31      | 0.34      | 0.26         |
| <b>WS Ba</b>     | 0.35      | 0.33                  | 0.09                  | 0.30                 | 0.33                    | 0.37      | 0.42      | 0.28                  | 0.20                  | 0.18      | 0.83     | 0.33      | 0.38      | 0.21      | 0.34         |
| <b>WS Pb</b>     | 0.31      | 0.32                  | 0.09                  | 0.19                 | 0.27                    | 0.15      | 0.24      | 0.24                  | 0.21                  | 0.01      | 0.17     | 0.19      | 0.21      | 0.18      | 0.32         |

| <b>2008-2013</b> | <b>Na</b> | <b>Al</b> | <b>Ti</b> | <b>Cu</b> | <b>WS V</b> | <b>WS Cr</b> | <b>WS Mn</b> | <b>WS Ni</b> | <b>WS Cu</b> | <b>WS Zn</b> | <b>WS As</b> | <b>WS Se</b> | <b>WS Cd</b> | <b>WS Ba</b> | <b>WS Pb</b> |
|------------------|-----------|-----------|-----------|-----------|-------------|--------------|--------------|--------------|--------------|--------------|--------------|--------------|--------------|--------------|--------------|
| <b>Na</b>        | 1.00      |           |           |           |             |              |              |              |              |              |              |              |              |              |              |
| <b>Al</b>        | 0.32      | 1.00      |           |           |             |              |              |              |              |              |              |              |              |              |              |
| <b>Ti</b>        | 0.30      | 0.87      | 1.00      |           |             |              |              |              |              |              |              |              |              |              |              |
| <b>Cu</b>        | 0.02      | 0.09      | 0.16      | 1.00      |             |              |              |              |              |              |              |              |              |              |              |
| <b>WS V</b>      | 0.50      | 0.30      | 0.32      | -0.02     | 1.00        |              |              |              |              |              |              |              |              |              |              |
| <b>WS Cr</b>     | 0.02      | 0.08      | 0.10      | 0.29      | 0.06        | 1.00         |              |              |              |              |              |              |              |              |              |
| <b>WS Mn</b>     | 0.09      | 0.32      | 0.43      | 0.30      | 0.09        | 0.22         | 1.00         |              |              |              |              |              |              |              |              |
| <b>WS Ni</b>     | 0.14      | 0.05      | 0.07      | -0.01     | 0.08        | 0.02         | 0.12         | 1.00         |              |              |              |              |              |              |              |
| <b>WS Cu</b>     | 0.00      | 0.08      | 0.14      | 0.83      | 0.03        | 0.38         | 0.30         | 0.08         | 1.00         |              |              |              |              |              |              |
| <b>WS Zn</b>     | -0.09     | -0.01     | 0.10      | 0.24      | -0.06       | 0.26         | 0.45         | 0.00         | 0.34         | 1.00         |              |              |              |              |              |
| <b>WS As</b>     | -0.20     | -0.02     | 0.00      | 0.10      | -0.15       | 0.18         | 0.05         | -0.15        | 0.07         | 0.20         | 1.00         |              |              |              |              |
| <b>WS Se</b>     | -0.07     | 0.00      | 0.08      | 0.03      | 0.17        | 0.15         | 0.13         | -0.03        | 0.08         | 0.20         | 0.36         | 1.00         |              |              |              |
| <b>WS Cd</b>     | -0.12     | -0.01     | 0.06      | 0.21      | -0.07       | 0.20         | 0.31         | -0.04        | 0.22         | 0.48         | 0.56         | 0.47         | 1.00         |              |              |
| <b>WS Ba</b>     | 0.07      | 0.22      | 0.28      | 0.50      | -0.06       | 0.18         | 0.47         | 0.14         | 0.47         | 0.30         | 0.13         | 0.09         | 0.25         | 1.00         |              |
| <b>WS Pb</b>     | -0.06     | -0.01     | 0.08      | 0.60      | 0.02        | 0.23         | 0.21         | 0.03         | 0.64         | 0.24         | 0.17         | 0.21         | 0.37         | 0.25         | 1.00         |

**Table S4b. Pearson correlations among pollutants during the cold season (November - April), 1998-2013 and 2008-2013.**

| <b>1998-2013</b>        | <b>CO</b> | <b>NO<sub>2</sub></b> | <b>SO<sub>2</sub></b> | <b>O<sub>3</sub></b> | <b>PM<sub>2.5</sub></b> | <b>OC</b> | <b>EC</b> | <b>NO<sub>3</sub></b> | <b>SO<sub>4</sub></b> | <b>Si</b> | <b>K</b> | <b>Ca</b> | <b>Fe</b> | <b>Zn</b> | <b>WS Fe</b> |
|-------------------------|-----------|-----------------------|-----------------------|----------------------|-------------------------|-----------|-----------|-----------------------|-----------------------|-----------|----------|-----------|-----------|-----------|--------------|
| <b>CO</b>               | 1.00      |                       |                       |                      |                         |           |           |                       |                       |           |          |           |           |           |              |
| <b>NO<sub>2</sub></b>   | 0.54      | 1.00                  |                       |                      |                         |           |           |                       |                       |           |          |           |           |           |              |
| <b>SO<sub>2</sub></b>   | 0.33      | 0.31                  | 1.00                  |                      |                         |           |           |                       |                       |           |          |           |           |           |              |
| <b>O<sub>3</sub></b>    | 0.01      | 0.24                  | -0.12                 | 1.00                 |                         |           |           |                       |                       |           |          |           |           |           |              |
| <b>PM<sub>2.5</sub></b> | 0.61      | 0.47                  | 0.24                  | 0.04                 | 1.00                    |           |           |                       |                       |           |          |           |           |           |              |
| <b>OC</b>               | 0.70      | 0.50                  | 0.21                  | 0.06                 | 0.82                    | 1.00      |           |                       |                       |           |          |           |           |           |              |
| <b>EC</b>               | 0.75      | 0.54                  | 0.27                  | -0.06                | 0.75                    | 0.86      | 1.00      |                       |                       |           |          |           |           |           |              |
| <b>NO<sub>3</sub></b>   | 0.16      | 0.12                  | 0.19                  | -0.40                | 0.42                    | 0.24      | 0.24      | 1.00                  |                       |           |          |           |           |           |              |
| <b>SO<sub>4</sub></b>   | 0.24      | 0.22                  | 0.18                  | 0.16                 | 0.65                    | 0.34      | 0.30      | 0.24                  | 1.00                  |           |          |           |           |           |              |
| <b>Si</b>               | 0.30      | 0.33                  | 0.12                  | 0.35                 | 0.35                    | 0.32      | 0.33      | -0.08                 | 0.17                  | 1.00      |          |           |           |           |              |
| <b>K</b>                | 0.32      | 0.26                  | 0.04                  | 0.10                 | 0.49                    | 0.49      | 0.40      | 0.09                  | 0.18                  | 0.31      | 1.00     |           |           |           |              |
| <b>Ca</b>               | 0.42      | 0.44                  | 0.31                  | 0.17                 | 0.43                    | 0.40      | 0.45      | 0.07                  | 0.21                  | 0.74      | 0.28     | 1.00      |           |           |              |
| <b>Fe</b>               | 0.57      | 0.49                  | 0.16                  | 0.14                 | 0.57                    | 0.59      | 0.63      | 0.09                  | 0.15                  | 0.61      | 0.42     | 0.60      | 1.00      |           |              |
| <b>Zn</b>               | 0.49      | 0.32                  | 0.18                  | -0.07                | 0.50                    | 0.50      | 0.53      | 0.21                  | 0.15                  | 0.25      | 0.30     | 0.36      | 0.50      | 1.00      |              |
| <b>WS Fe</b>            | 0.44      | 0.39                  | 0.14                  | 0.18                 | 0.60                    | 0.49      | 0.52      | 0.11                  | 0.47                  | 0.44      | 0.29     | 0.40      | 0.67      | 0.28      | 1.00         |

  

| <b>2008-2013</b> | <b>CO</b> | <b>NO<sub>2</sub></b> | <b>SO<sub>2</sub></b> | <b>O<sub>3</sub></b> | <b>PM<sub>2.5</sub></b> | <b>OC</b> | <b>EC</b> | <b>NO<sub>3</sub></b> | <b>SO<sub>4</sub></b> | <b>Si</b> | <b>K</b> | <b>Ca</b> | <b>Fe</b> | <b>Zn</b> | <b>WS Fe</b> |
|------------------|-----------|-----------------------|-----------------------|----------------------|-------------------------|-----------|-----------|-----------------------|-----------------------|-----------|----------|-----------|-----------|-----------|--------------|
| <b>Na</b>        | -0.01     | -0.03                 | -0.13                 | 0.09                 | 0.21                    | 0.21      | 0.10      | -0.17                 | 0.14                  | 0.14      | 0.34     | 0.15      | 0.06      | 0.10      | 0.05         |
| <b>Al</b>        | 0.16      | 0.22                  | -0.10                 | 0.41                 | 0.25                    | 0.22      | 0.19      | -0.16                 | 0.07                  | 0.86      | 0.42     | 0.71      | 0.44      | 0.12      | 0.16         |
| <b>Ti</b>        | 0.41      | 0.44                  | 0.17                  | 0.27                 | 0.43                    | 0.42      | 0.47      | -0.01                 | 0.13                  | 0.72      | 0.50     | 0.76      | 0.71      | 0.43      | 0.40         |
| <b>Cu</b>        | 0.26      | 0.25                  | 0.10                  | 0.06                 | 0.24                    | 0.26      | 0.28      | 0.04                  | 0.04                  | 0.15      | 0.19     | 0.21      | 0.27      | 0.23      | 0.23         |
| <b>WS V</b>      | -0.08     | -0.10                 | -0.10                 | 0.07                 | 0.23                    | 0.11      | 0.00      | -0.12                 | 0.40                  | 0.07      | 0.26     | 0.07      | -0.06     | 0.00      | 0.11         |
| <b>WS Cr</b>     | 0.34      | 0.22                  | 0.04                  | 0.10                 | 0.38                    | 0.38      | 0.40      | 0.03                  | 0.20                  | 0.13      | 0.36     | 0.22      | 0.37      | 0.45      | 0.56         |
| <b>WS Mn</b>     | 0.42      | 0.32                  | 0.12                  | 0.11                 | 0.40                    | 0.35      | 0.55      | -0.03                 | 0.16                  | 0.18      | 0.38     | 0.25      | 0.62      | 0.44      | 0.48         |
| <b>WS Ni</b>     | 0.03      | 0.01                  | -0.04                 | 0.05                 | 0.03                    | 0.03      | 0.09      | -0.09                 | -0.03                 | 0.01      | 0.08     | 0.01      | 0.09      | 0.05      | 0.11         |
| <b>WS Cu</b>     | 0.26      | 0.24                  | 0.07                  | 0.06                 | 0.28                    | 0.30      | 0.29      | -0.01                 | 0.08                  | 0.03      | 0.16     | 0.11      | 0.24      | 0.29      | 0.27         |
| <b>WS Zn</b>     | 0.59      | 0.48                  | 0.17                  | 0.01                 | 0.53                    | 0.56      | 0.67      | 0.19                  | 0.13                  | 0.12      | 0.47     | 0.23      | 0.50      | 0.83      | 0.43         |
| <b>WS As</b>     | 0.54      | 0.39                  | 0.15                  | 0.04                 | 0.49                    | 0.52      | 0.52      | 0.20                  | 0.09                  | 0.12      | 0.43     | 0.22      | 0.41      | 0.44      | 0.35         |
| <b>WS Se</b>     | 0.17      | 0.22                  | 0.40                  | -0.04                | 0.43                    | 0.32      | 0.27      | 0.28                  | 0.47                  | 0.05      | 0.19     | 0.24      | 0.21      | 0.28      | 0.40         |
| <b>WS Cd</b>     | 0.45      | 0.31                  | 0.26                  | 0.01                 | 0.53                    | 0.55      | 0.53      | 0.21                  | 0.18                  | 0.11      | 0.38     | 0.24      | 0.40      | 0.56      | 0.41         |
| <b>WS Ba</b>     | 0.56      | 0.51                  | 0.28                  | 0.07                 | 0.41                    | 0.42      | 0.62      | 0.08                  | 0.09                  | 0.11      | 0.48     | 0.24      | 0.64      | 0.51      | 0.48         |
| <b>WS Pb</b>     | 0.23      | 0.15                  | 0.07                  | 0.05                 | 0.24                    | 0.27      | 0.19      | 0.03                  | 0.07                  | 0.02      | 0.21     | 0.06      | 0.10      | 0.27      | 0.14         |



| <u>2008-2013</u> | Na    | Al    | Ti   | Cu    | WS V  | WS Cr | WS Mn | WS Ni | WS Cu | WS Zn | WS As | WS Se | WS Cd | WS Ba | WS Pb |
|------------------|-------|-------|------|-------|-------|-------|-------|-------|-------|-------|-------|-------|-------|-------|-------|
| Na               | 1.00  |       |      |       |       |       |       |       |       |       |       |       |       |       |       |
| Al               | 0.20  | 1.00  |      |       |       |       |       |       |       |       |       |       |       |       |       |
| Ti               | 0.13  | 0.62  | 1.00 |       |       |       |       |       |       |       |       |       |       |       |       |
| Cu               | -0.01 | 0.12  | 0.30 | 1.00  |       |       |       |       |       |       |       |       |       |       |       |
| WS V             | 0.49  | 0.08  | 0.04 | -0.04 | 1.00  |       |       |       |       |       |       |       |       |       |       |
| WS Cr            | 0.15  | 0.11  | 0.26 | 0.08  | 0.17  | 1.00  |       |       |       |       |       |       |       |       |       |
| WS Mn            | 0.15  | 0.17  | 0.46 | 0.14  | 0.06  | 0.37  | 1.00  |       |       |       |       |       |       |       |       |
| WS Ni            | 0.14  | 0.01  | 0.07 | 0.07  | 0.11  | 0.06  | 0.20  | 1.00  |       |       |       |       |       |       |       |
| WS Cu            | -0.04 | 0.04  | 0.13 | 0.95  | -0.03 | 0.11  | 0.16  | 0.10  | 1.00  |       |       |       |       |       |       |
| WS Zn            | -0.03 | 0.11  | 0.34 | 0.32  | 0.01  | 0.46  | 0.36  | 0.00  | 0.27  | 1.00  |       |       |       |       |       |
| WS As            | -0.02 | 0.13  | 0.21 | 0.31  | -0.02 | 0.30  | 0.23  | -0.04 | 0.27  | 0.57  | 1.00  |       |       |       |       |
| WS Se            | 0.07  | -0.03 | 0.10 | 0.17  | 0.13  | 0.28  | 0.07  | 0.00  | 0.20  | 0.32  | 0.29  | 1.00  |       |       |       |
| WS Cd            | 0.04  | 0.14  | 0.25 | 0.51  | -0.01 | 0.27  | 0.20  | -0.04 | 0.43  | 0.58  | 0.49  | 0.43  | 1.00  |       |       |
| WS Ba            | -0.02 | 0.11  | 0.40 | 0.25  | -0.11 | 0.35  | 0.67  | 0.18  | 0.27  | 0.46  | 0.33  | 0.15  | 0.31  | 1.00  |       |
| WS Pb            | -0.02 | 0.09  | 0.08 | 0.76  | 0.03  | 0.11  | 0.01  | -0.01 | 0.78  | 0.31  | 0.30  | 0.23  | 0.40  | 0.15  | 1.00  |

**Figure S1. Estimated associations between cardiovascular ED visits and tomorrow's pollutant levels, 1998-2013 year-round analysis (3303 days).**

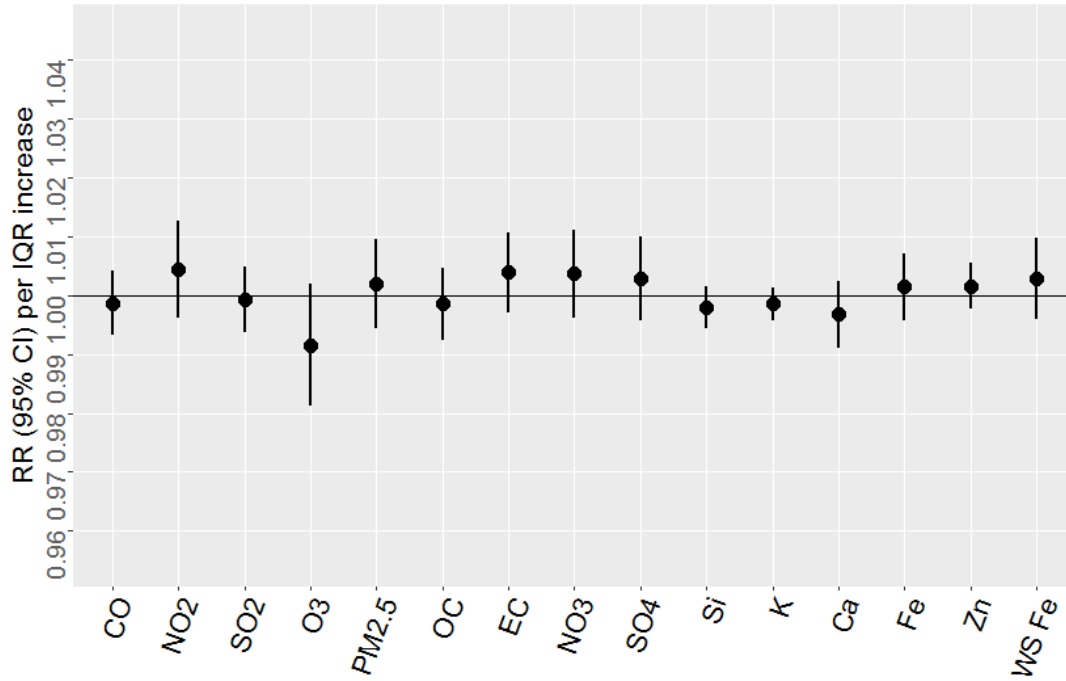

**Figure S2. Estimated associations between cardiovascular ED visits and tomorrow's pollutant levels, 2008-2013 year-round analysis (628 days).**

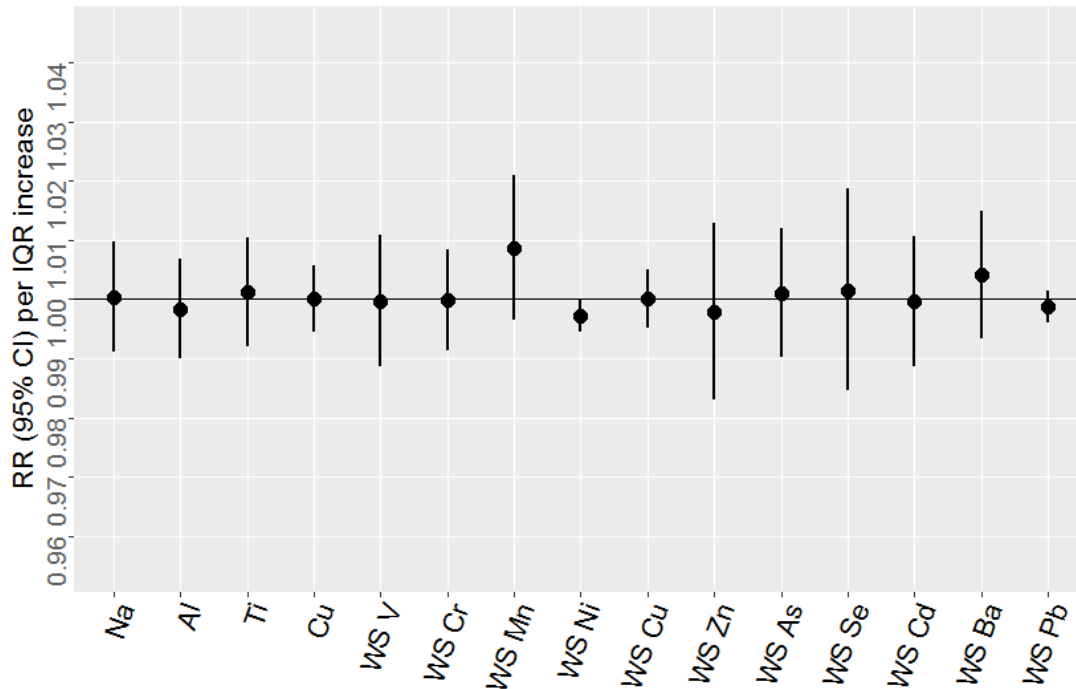

**Figure S3. Estimated associations between cardiovascular ED visits and pollutants available during 1998-2013, year-round analysis including all days with data available for each pollutant.**

**a) Results from single-pollutant models**

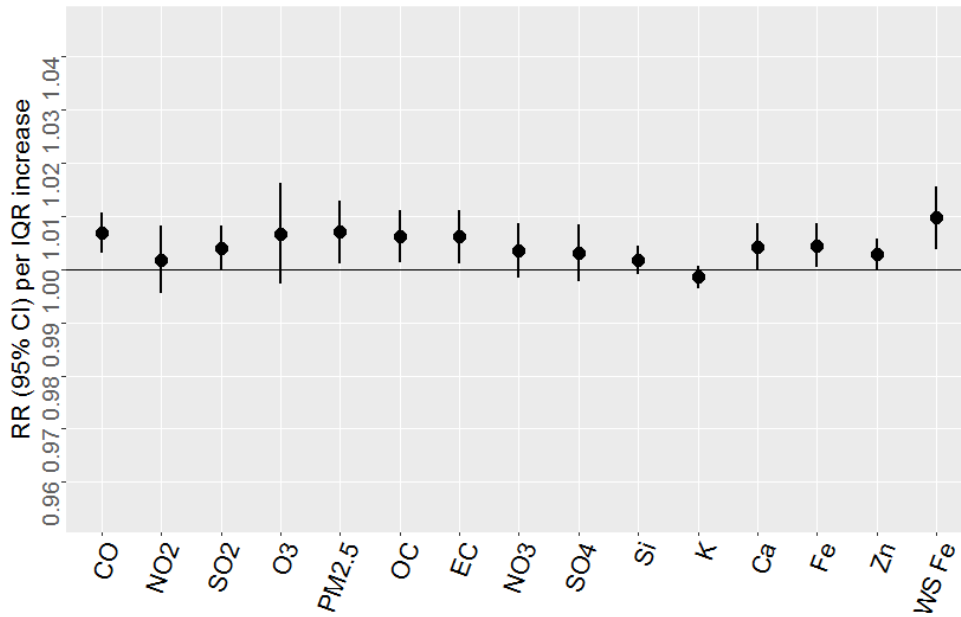

**b) Results from two-pollutant models: water-soluble Fe controlling for each of the other pollutants**

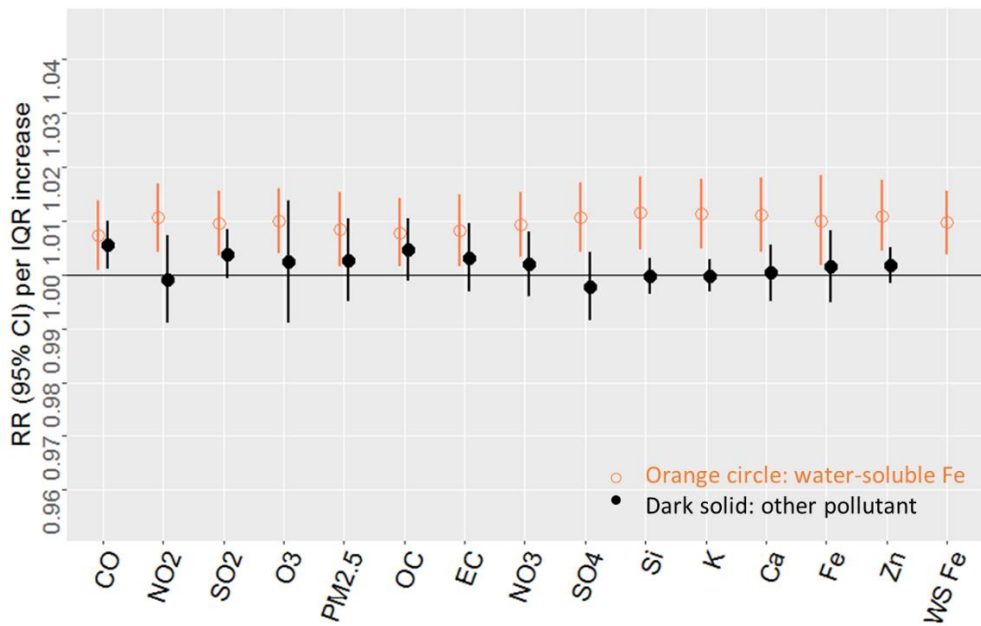

**Figure S4. Estimated associations between cardiovascular ED visits and pollutants available during 1998-2013, warm-season analysis including all days with data available for each pollutant.**

**a) Results from single-pollutant models**

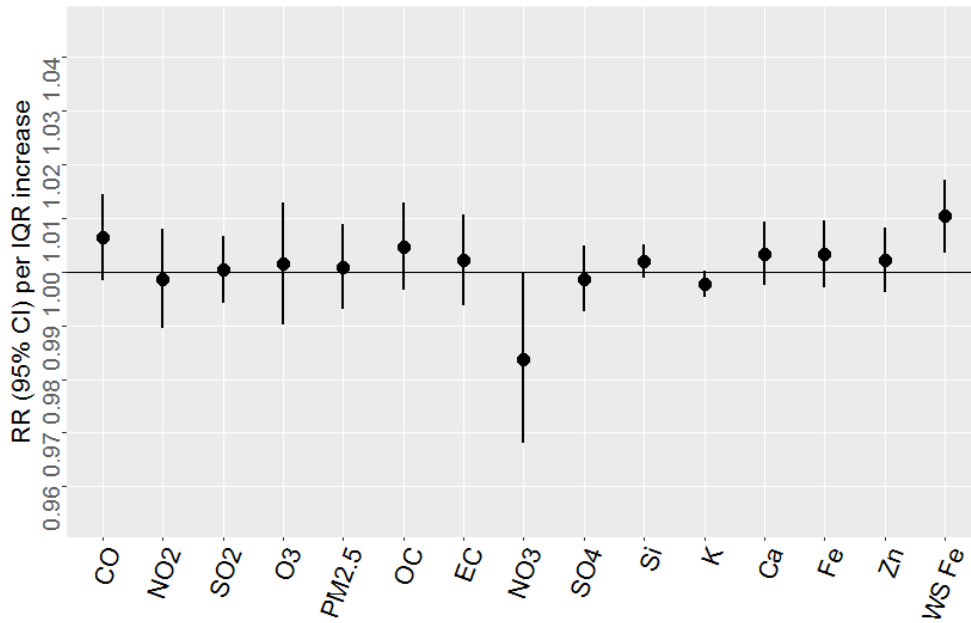

**b) Results from two-pollutant models: water-soluble Fe controlling for each of the other pollutants**

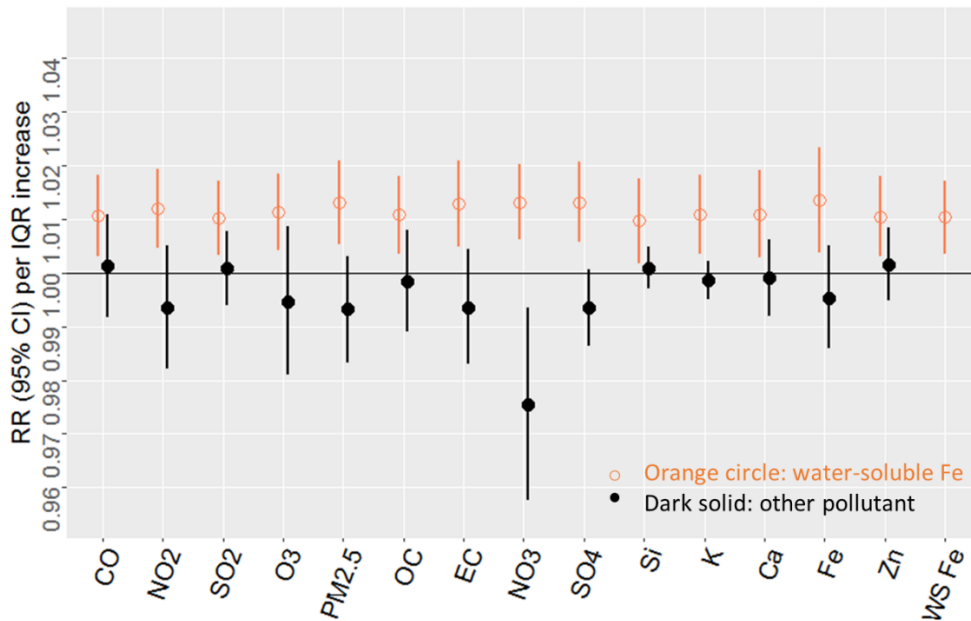

**Figure S5. Estimated associations between cardiovascular ED visits and pollutants available during 1998-2013, cold-season analysis including all days with data available for each pollutant.**

**a) Results from single-pollutant models**

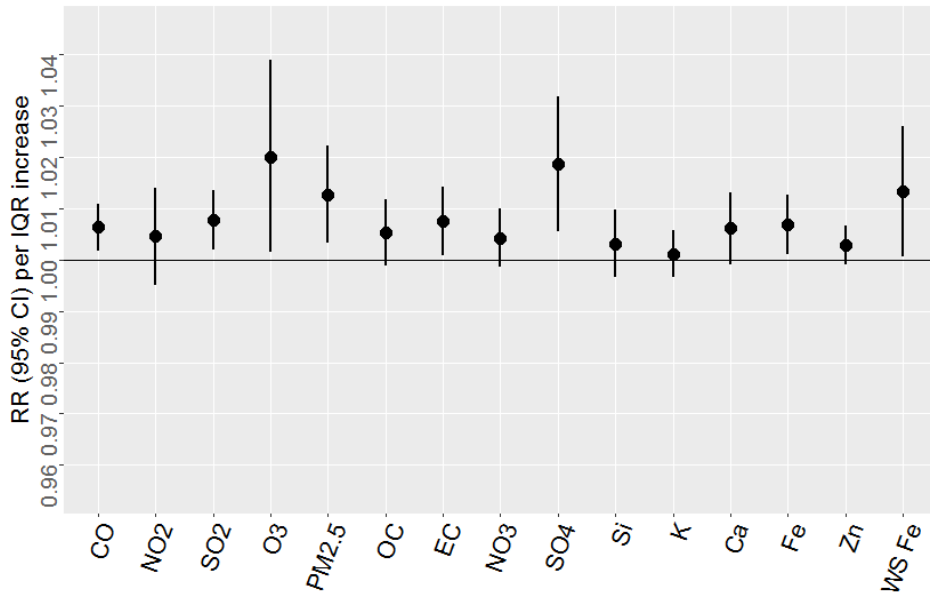

**b) Results from two-pollutant models: water-soluble Fe controlling for each of the other pollutants**

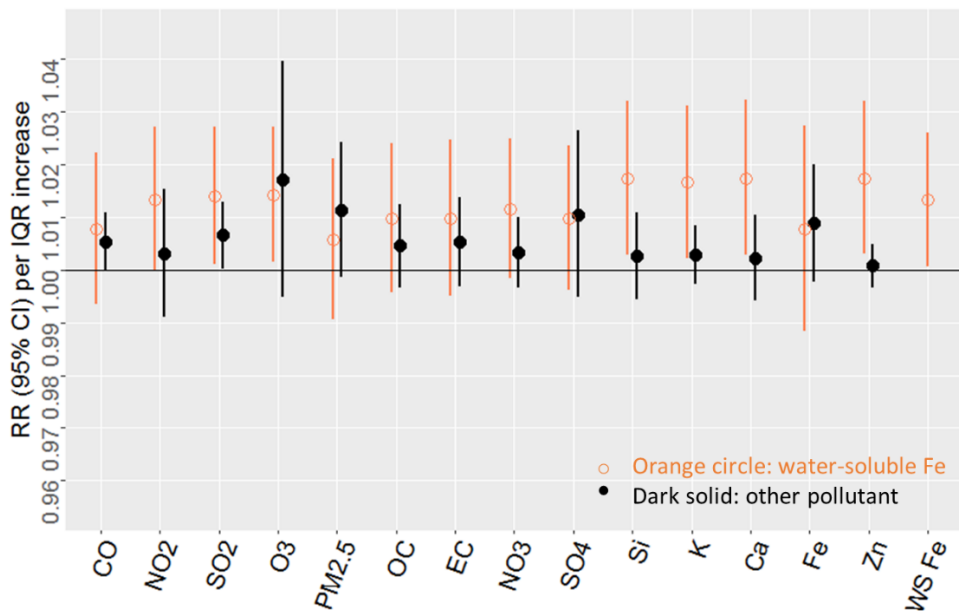

**Figure S6. Estimated associations between cardiovascular ED visits and pollutants only available during 2008-2013 and water-soluble Fe during 2008-2013, year-round analysis including all days with data available for each pollutant.**

**a) Results from single-pollutant models**

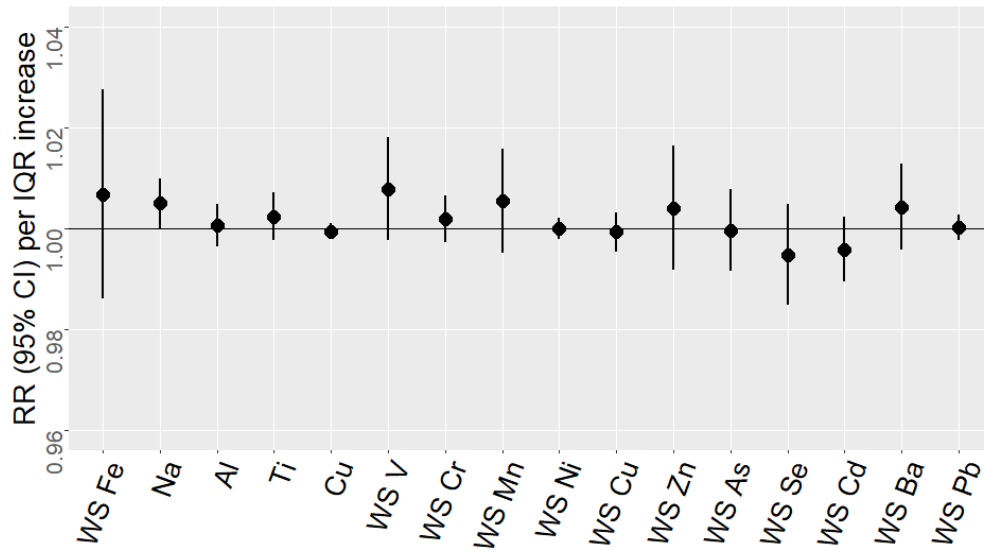

**b) Results from two-pollutant models: water-soluble Fe controlling for each of the other pollutants**

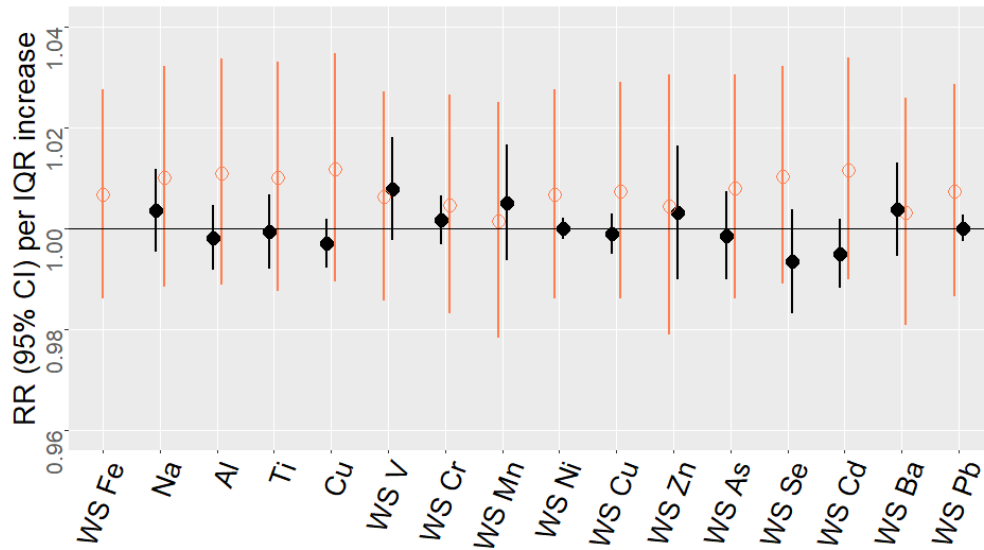

Supplement: EHP2182.s001.acco.pdf [file EHP2182.s001.acco.pdf]
